# Supplementary material for: Five new 2D and 3D coordination polymers based on two new multifunctional pyridyl–tricarboxylate ligands: hydrothermal syntheses, structural diversity, luminescent and magnetic properties
Source: Royal Society of Chemistry journal article supplement (doi:10.1039/c7ra02063e), 2017-01-01
Supplement: c7ra02063e1.pdf [file c7ra02063e1.pdf]

## Supporting Information

### Five new 2D and 3D coordination polymers based on two new multifunctional pyridyl-tricarboxylate ligands: hydrothermal syntheses, structural diversity, luminescent and magnetic properties

Xiao-Yu Guo, Fei Zhao, Hou-Ting Liu, Yan-Qin Wang\*, Zhi-Liang Liu\* and En-Qing Gao

Table S1. The selected bond lengths (Å) and angles (°) for compound 1.

|                   |          |                   |            |
|-------------------|----------|-------------------|------------|
| Zn(1)-O(6)C       | 1.992(5) | Zn(1)-O(3)A       | 2.038(6)   |
| Zn(1)-O(4)B       | 2.004(5) | Zn(1)-N(1)        | 2.075(5)   |
| Zn(1)-O(6)        | 2.118(6) | O(6)C-Zn(1)-O(4)B | 102.7(2)   |
| O(6)C-Zn(1)-O(3)A | 95.8(2)  | O(4)B-Zn(1)-O(3)A | 87.1(2)    |
| O(6)C-Zn(1)-N(1)  | 105.3(3) | O(4)B-Zn(1)-N(1)  | 151.6(3)   |
| O(3)A-Zn(1)-N(1)  | 94.6(3)  | O(6)C-Zn(1)-O(6)  | 108.41(18) |
| O(4)B-Zn(1)-O(6)  | 89.6(2)  | O(3)A-Zn(1)-O(6)  | 155.7(2)   |
| N(1)-Zn(1)-O(6)   | 77.3(3)  |                   |            |

Symmetry transformations used to generate equivalent atoms: A: 2-x, 1-y, 0.5+z; B: 0.5+x, 1-y, z; C: 2.5-x, y, 0.5+z.

Table S2. The selected bond lengths (Å) and angles (°) for compound 2.

|                   |            |                   |            |
|-------------------|------------|-------------------|------------|
| Cd(1)-O(9)        | 2.251(5)   | Cd(1)-O(9)A       | 2.280(5)   |
| Cd(1)-O(2)B       | 2.318(4)   | Cd(1)-N(1)        | 2.325(6)   |
| Cd(1)-O(4)E       | 2.342(4)   | Cd(1)-N(2)        | 2.405(5)   |
| Cd(2)-O(5)        | 2.285(5)   | Cd(2)-O(9)        | 2.225(4)   |
| Cd(2)-N(4)        | 2.374(6)   | Cd(2)-N(5)E       | 2.354(5)   |
| Cd(2)-N(3)        | 2.441(5)   | Cd(2)-O(4)E       | 2.418(4)   |
| O(9)A-Cd(1)-O(2)B | 81.69(17)  | O(9)-Cd(1)-O(9)A  | 81.56(18)  |
| O(9)A-Cd(1)-N(1)  | 97.36(19)  | O(9)-Cd(1)-O(2)B  | 106.65(18) |
| O(2)B-Cd(1)-N(1)  | 92.06(19)  | O(9)-Cd(1)-N(1)   | 160.81(18) |
| O(2)B-Cd(1)-O(4)E | 75.03(15)  | O(9)-Cd(1)-O(4)E  | 78.97(16)  |
| O(9)-Cd(1)-N(2)   | 93.30(19)  | O(9)A-Cd(1)-O(4)E | 143.68(16) |
| O(2)B-Cd(1)-N(2)  | 154.73(19) | N(1)-Cd(1)-O(4)E  | 110.79(18) |
| O(9)-Cd(2)-O(5)   | 95.62(17)  | O(9)A-Cd(1)-N(2)  | 117.23(18) |
| O(5)-Cd(2)-N(5)E  | 98.49(17)  | N(1)-Cd(1)-N(2)   | 70.0(2)    |
| O(5)-Cd(2)-N(4)   | 107.2(2)   | O(9)-Cd(2)-N(5)E  | 141.83(18) |
| O(9)-Cd(2)-O(4)E  | 77.86(16)  | O(9)-Cd(2)-N(4)   | 101.28(19) |
| N(5)E-Cd(2)-O(4)E | 68.13(16)  | N(5)E-Cd(2)-N(4)  | 107.98(19) |

|                  |           |                  |            |
|------------------|-----------|------------------|------------|
| O(9)-Cd(2)-N(3)  | 87.85(18) | O(5)-Cd(2)-O(4)E | 85.66(17)  |
| N(5)E-Cd(2)-N(3) | 80.65(18) | N(4)-Cd(2)-O(4)E | 167.09(17) |
| O(4)E-Cd(2)-N(3) | 98.35(17) | O(5)-Cd(2)-N(3)  | 175.19(18) |
| N(4)-Cd(2)-N(3)  | 68.75(19) |                  |            |

Hydrogen bond lengths (Å) and angles (°) for compound **2**.

| D-H | A                       | d(D-H) | d(H..A) | <DHA   | d(D..A) |
|-----|-------------------------|--------|---------|--------|---------|
| O7  | O8 [ x, y+1, z ]        | 0.850  | 2.136   | 162.88 | 2.959   |
| O7  | O10                     | 0.850  | 1.982   | 162.72 | 2.805   |
| O8  | O3 [ -x+1, -y+1, -z ]   | 0.850  | 2.041   | 162.54 | 2.864   |
| O8  | O7 [ -x+1, -y+1, -z ]   | 0.850  | 2.153   | 137.22 | 2.836   |
| O9  | O1 [ -x+1, -y+1, -z+1 ] | 0.726  | 2.160   | 160.93 | 2.856   |

D : Donor; A: Acceptor

Symmetry transformations used to generate equivalent atoms: A: -x+2, -y+1, -z+1; B: x+1, y, z; E: -x+2, -y+1, -z.

Table S3. The selected bond lengths (Å) and angles (°) for compound **3**.

|                   |            |                   |            |
|-------------------|------------|-------------------|------------|
| Co(1)-O(5)        | 2.0437(16) | Co(1)-O(3)B       | 2.1084(13) |
| Co(1)-O(4)        | 2.0697(13) | Co(1)-O(2)A       | 2.1111(13) |
| Co(1)-N(1)A       | 2.1338(15) | Co(1)-O(6)        | 2.1459(13) |
| O(5)-Co(1)-O(4)   | 94.40(6)   | O(5)-Co(1)-O(3)B  | 88.72(7)   |
| O(4)-Co(1)-O(3)B  | 100.15(5)  | O(5)-Co(1)-O(2)A  | 100.75(7)  |
| O(4)-Co(1)-O(2)A  | 91.15(5)   | O(3)B-Co(1)-O(2)A | 164.71(5)  |
| O(5)-Co(1)-N(1)A  | 177.48(7)  | O(4)-Co(1)-N(1)A  | 86.88(5)   |
| O(3)B-Co(1)-N(1)A | 93.20(6)   | O(2)A-Co(1)-N(1)A | 77.04(5)   |
| O(5)-Co(1)-O(6)   | 83.65(6)   | O(4)-Co(1)-O(6)   | 173.30(5)  |
| O(3)B-Co(1)-O(6)  | 86.23(5)   | O(2)A-Co(1)-O(6)  | 82.95(5)   |
| N(1)A-Co(1)-O(6)  | 94.84(5)   |                   |            |

Hydrogen bond lengths (Å) and angles (°) for compound **3**.

| D  | A                          | d(D-H) | d(H..A) | <DHA   | d(D..A) |
|----|----------------------------|--------|---------|--------|---------|
| O5 | O1 [ -x+1, y+1/2, -z+1/2 ] | 0.820  | 1.978   | 158.63 | 2.758   |
| O6 | O1 [ x, y, z-1 ]           | 0.820  | 1.872   | 166.64 | 2.676   |
| O7 | O8 [ -x, -y+2, -z+1 ]      | 0.820  | 1.791   | 173.20 | 2.607   |
| O6 | O2 [ -x+1, y+1/2, -z+1/2 ] | 0.831  | 1.925   | 174.49 | 2.753   |
| O5 | O6 [ x, -y+3/2, z+1/2 ]    | 0.775  | 2.020   | 157.07 | 2.750   |

D : Donor; A: Acceptor

Symmetry transformations used to generate equivalent atoms: A: x, 0.5-y, -0.5+z; B: x, 1.5-y, -0.5+z.

Table S4. The selected bond lengths (Å) and angles (°) for compound **4**.

|                   |            |                   |            |
|-------------------|------------|-------------------|------------|
| Co(1)-O(3)C       | 2.0718(12) | Co(1)-O(3)        | 2.0718(12) |
| Co(1)-O(1)B       | 2.0872(12) | Co(1)-O(1)A       | 2.0872(12) |
| Co(1)-O(4)        | 2.1328(12) | Co(1)-O(4)C       | 2.1328(12) |
| Co(2)-O(8)        | 2.0674(14) | Co(2)-O(8)E       | 2.0674(14) |
| Co(2)-O(9)        | 2.0779(11) | Co(2)-O(9)E       | 2.0779(11) |
| Co(2)-N(1)E       | 2.1073(12) | Co(2)-N(1)        | 2.1073(12) |
| Co(3)-O(5)D       | 2.0812(12) | Co(3)-O(5)        | 2.0812(12) |
| Co(3)-O(7)        | 2.1066(11) | Co(3)-O(7)D       | 2.1066(11) |
| Co(3)-O(6)        | 2.1045(14) | Co(3)-O(6)D       | 2.1045(14) |
| O(1)B-Co(1)-O(1)A | 180.0      | O(3)C-Co(1)-O(4)  | 84.20(5)   |
| O(3)-Co(1)-O(4)   | 95.80(5)   | O(1)A-Co(1)-O(4)  | 88.66(6)   |
| O(1)B-Co(1)-O(4)  | 91.34(6)   | O(3)C-Co(1)-O(4)C | 95.80(5)   |
| O(3)-Co(1)-O(4)C  | 84.20(5)   | O(1)A-Co(1)-O(4)C | 91.34(6)   |
| O(4)-Co(1)-O(4)C  | 180.00(3)  | O(1)B-Co(1)-O(4)C | 88.66(6)   |
| O(8)-Co(2)-O(8)E  | 180.0      | O(8)-Co(2)-O(9)   | 89.90(6)   |
| O(8)E-Co(2)-O(9)  | 90.10(6)   | O(8)-Co(2)-O(9)E  | 90.10(6)   |
| O(8)E-Co(2)-O(9)E | 89.90(6)   | O(9)-Co(2)-O(9)E  | 180.0      |
| O(8)-Co(2)-N(1)E  | 88.47(5)   | O(8)E-Co(2)-N(1)E | 91.53(5)   |
| O(9)-Co(2)-N(1)E  | 102.23(5)  | O(9)E-Co(2)-N(1)E | 77.77(5)   |
| O(8)-Co(2)-N(1)   | 91.53(5)   | O(8)E-Co(2)-N(1)  | 88.47(5)   |
| O(9)-Co(2)-N(1)   | 77.77(5)   | O(9)E-Co(2)-N(1)  | 102.23(5)  |
| N(1)E-Co(2)-N(1)  | 180.0      | O(5)D-Co(3)-O(5)  | 180.000(1) |
| O(5)D-Co(3)-O(7)  | 87.66(5)   | O(5)-Co(3)-O(7)   | 92.34(5)   |
| O(5)-Co(3)-O(7)D  | 87.66(5)   | O(5)D-Co(3)-O(7)D | 92.34(5)   |
| O(7)-Co(3)-O(7)D  | 180.00(5)  | O(5)D-Co(3)-O(6)  | 89.93(6)   |
| O(5)-Co(3)-O(6)   | 90.07(6)   | O(7)-Co(3)-O(6)   | 89.82(5)   |
| O(7)D-Co(3)-O(6)  | 90.18(5)   | O(5)D-Co(3)-O(6)D | 90.07(6)   |
| O(7)-Co(3)-O(6)D  | 90.18(5)   | O(5)-Co(3)-O(6)D  | 89.93(6)   |
| O(7)D-Co(3)-O(6)D | 89.82(5)   | O(6)-Co(3)-O(6)D  | 180.0      |

Symmetry transformations used to generate equivalent atoms: A: -x+1, -y, -z+2; B: x-1, y, z; C: -x, -y, -z+2; D: -x, -y+1, -z+2; E: -x-1, -y+1, -z+1.

Table S5. The selected bond lengths (Å) and angles (°) for compound **5**.

|                   |           |                   |           |
|-------------------|-----------|-------------------|-----------|
| Mn(1)-O(5)C       | 2.130(3)  | Mn(1)-O(7)E       | 2.152(3)  |
| Mn(1)-O(5)B       | 2.130(3)  | Mn(1)-O(7)D       | 2.152(3)  |
| Mn(1)-O(2)        | 2.219(3)  | Mn(1)-O(2)A       | 2.219(3)  |
| Mn(2)-O(1)        | 2.122(3)  | Mn(2)-O(6)E       | 2.128(3)  |
| Mn(2)-O(4)B       | 2.147(3)  | Mn(2)-O(2)        | 2.188(3)  |
| Mn(2)-N(1)        | 2.316(4)  | O(5)C-Mn(1)-O(5)B | 180.0     |
| O(5)C-Mn(1)-O(7)D | 92.89(14) | O(5)B-Mn(1)-O(7)D | 87.11(14) |
| O(5)C-Mn(1)-O(7)E | 87.11(14) | O(5)B-Mn(1)-O(7)E | 92.89(14) |
| O(7)D-Mn(1)-O(7)E | 180.0     | O(5)C-Mn(1)-O(2)  | 94.99(13) |
| O(5)B-Mn(1)-O(2)  | 85.01(13) | O(7)D-Mn(1)-O(2)  | 94.57(13) |

|                   |           |                   |            |
|-------------------|-----------|-------------------|------------|
| O(7)E-Mn(1)-O(2)  | 85.43(13) | O(5)C-Mn(1)-O(2)A | 85.01(13)  |
| O(5)B-Mn(1)-O(2)A | 94.99(13) | O(7)D-Mn(1)-O(2)A | 85.43(13)  |
| O(7)E-Mn(1)-O(2)A | 94.57(13) | O(2)-Mn(1)-O(2)A  | 180.00(3)  |
| O(1)-Mn(2)-O(6)E  | 92.06(14) | O(1)-Mn(2)-O(4)B  | 114.84(15) |
| O(6)E-Mn(2)-O(4)B | 94.47(14) | O(1)-Mn(2)-O(2)   | 133.95(14) |
| O(6)E-Mn(2)-O(2)  | 98.54(13) | O(4)B-Mn(2)-O(2)  | 108.84(13) |
| O(1)-Mn(2)-N(1)   | 83.59(15) | O(6)E-Mn(2)-N(1)  | 170.36(15) |
| O(4)B-Mn(2)-N(1)  | 79.68(15) | O(2)-Mn(2)-N(1)   | 90.64(13)  |

Hydrogen bond lengths (Å) and angles (°) for compound **5** (D : Donor; A: Acceptor).

| D  | A                     | d(D..A) | d(D-H) | d(H..A) | <DHA  |
|----|-----------------------|---------|--------|---------|-------|
| O1 | O3 [ -x, -y+1, -z+1 ] | 0.820   | 1.991  | 166.54  | 2.795 |
| O1 | N2 [ x-1, y-1, z ]    | 0.812   | 1.919  | 173.14  | 2.727 |

Symmetry transformations used to generate equivalent atoms: A: -x, 1-y, -z; B: 1+x, y, z; C: -1-x, 1-y, -z; D: -x, 2-y, -z; E: x, -1+y, z.

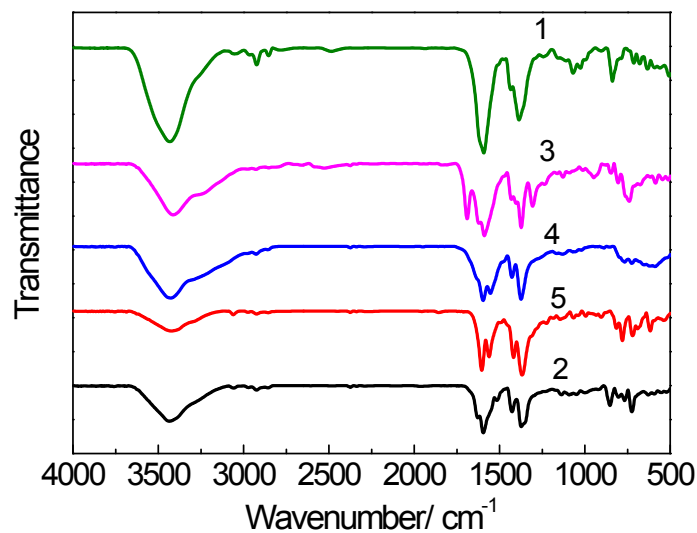

Fig. S1 The IR spectra of compounds **1-5**.

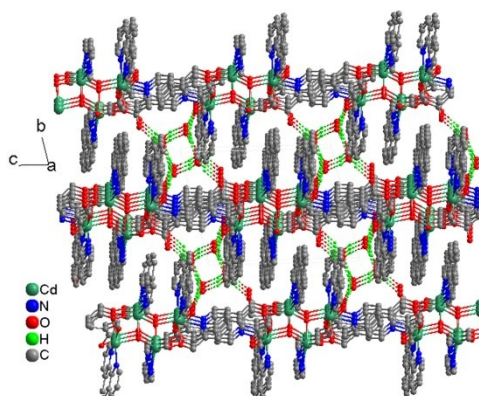

Fig. S2 The 3D structure interlinked by O-H...O hydrogen bonds in compound **2**.

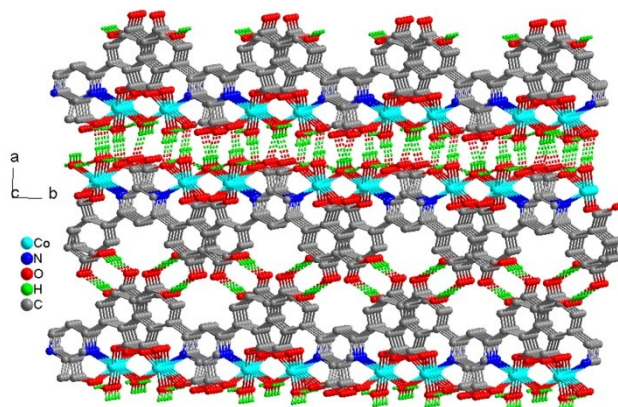

Fig. S3 The 3D structure interlinked by O-H...O hydrogen bonds in compound 3.

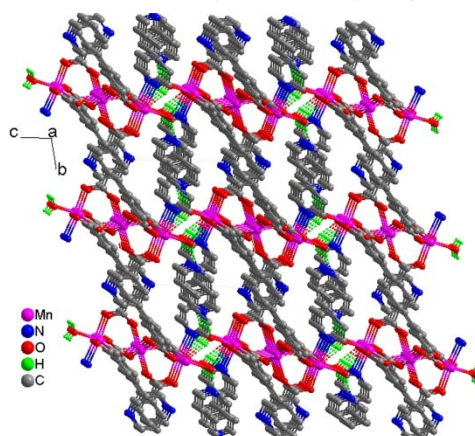

Fig. S4 The 3D structure interlinked by O-H...O and O-H...N hydrogen bonds in compound 5.

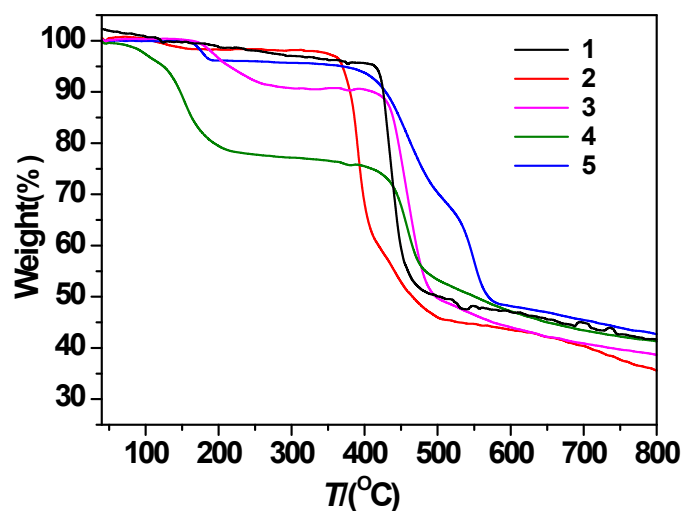

Fig. S5 The TGA curves for 1, 2, 3, 4 and 5.

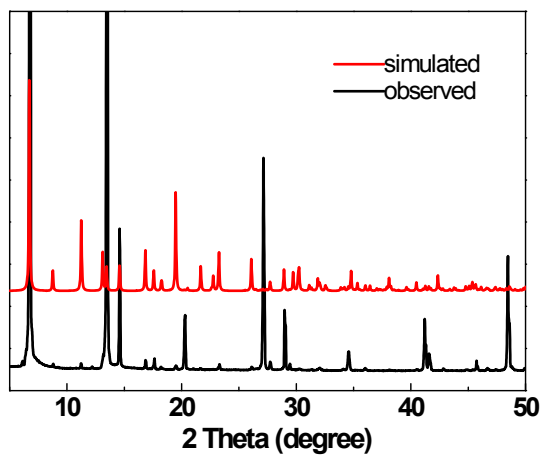

Fig. S6. PXRD patterns for 1.

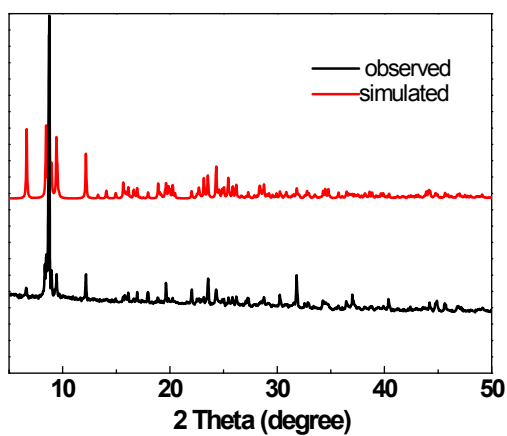

Fig. S7. PXRD patterns for 2.

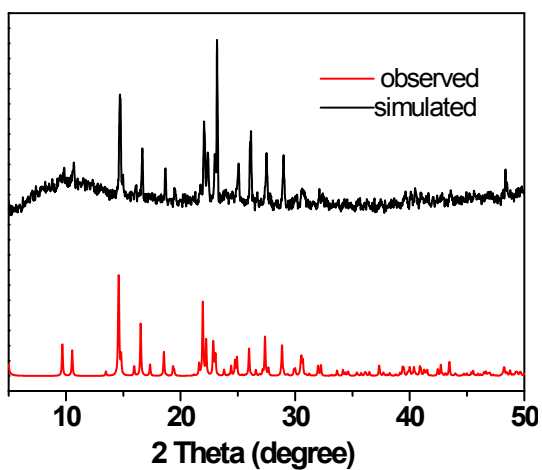

Fig. S8. PXRD patterns for 3.

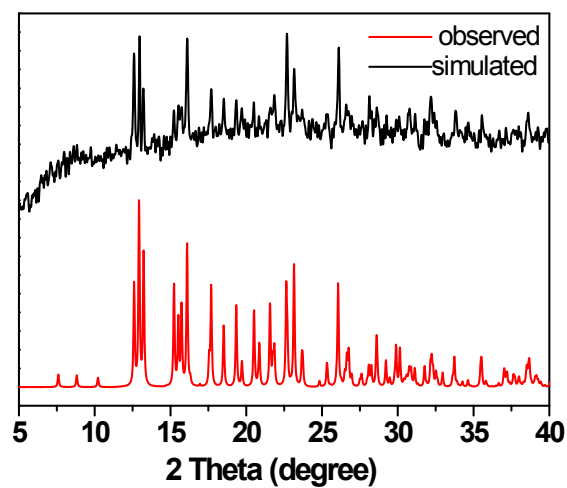

Fig. S9. PXRD patterns for 4.

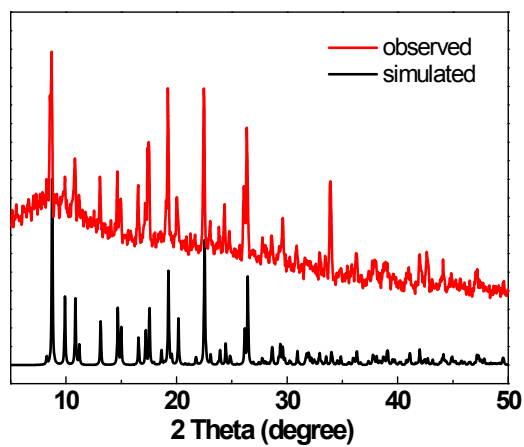

Fig. S10. PXRD patterns for 5.

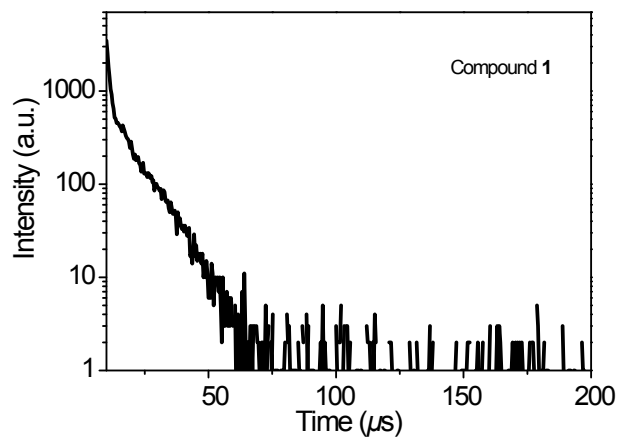

Fig. S11. Semilog plot of fluorescence decay versus time, excited and monitored at 330 nm and 534 nm for 1.

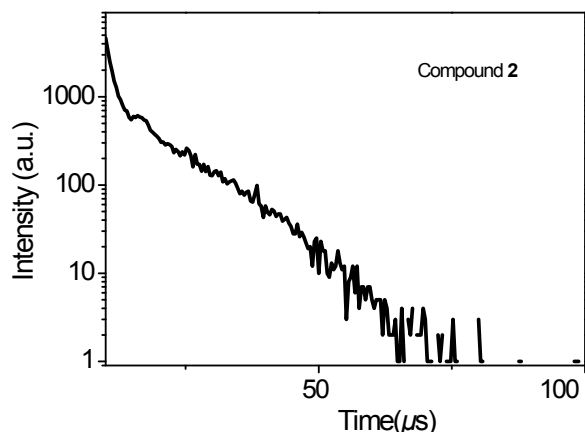

Fig. S12. Semilog plot of fluorescence decay versus time, excited and monitored at 370 nm and 429 nm for **2**.
